# Supplementary material for: Telomere shortening leads to an acceleration of synucleinopathy and impaired microglia response in a genetic mouse model
Source: Acta Neuropathol Commun. 2016 Aug 22;4(1):87. doi: 10.1186/s40478-016-0364-x (PMC4994259; doi:10.1186/s40478-016-0364-x)

Suppl. Fig. 4

Dendritic Length

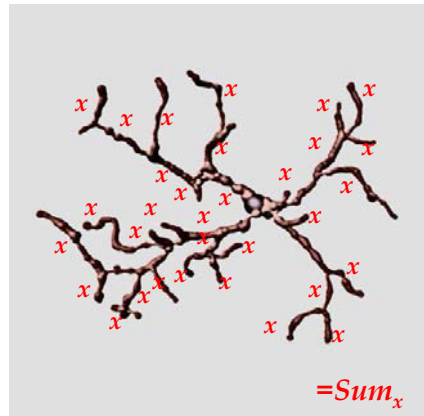

Dendritic Volume

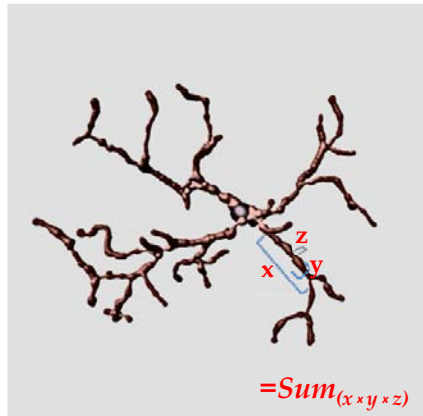

Dendritic Branch Points

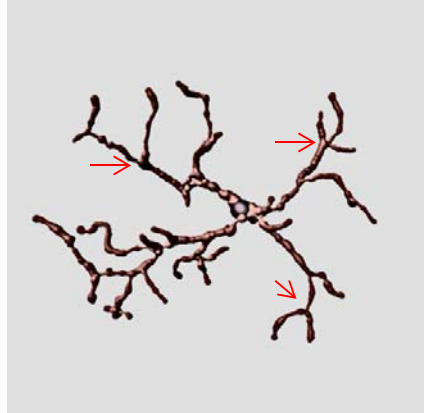

Dendritic Segments

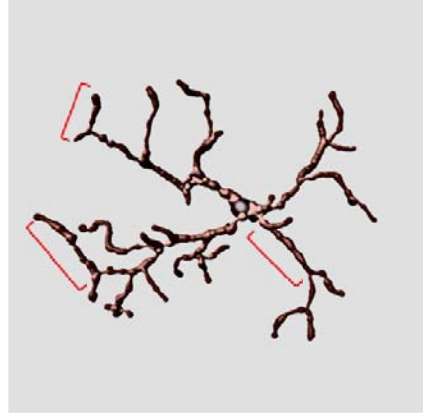

Dendritic Terminal Points

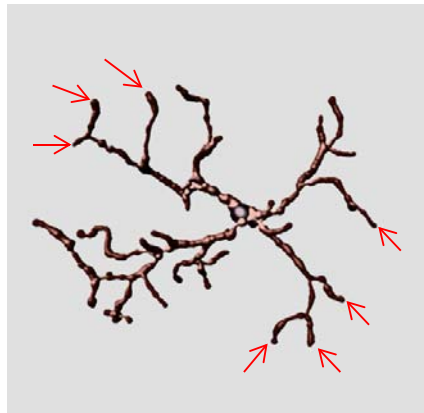

Sholl Intersections

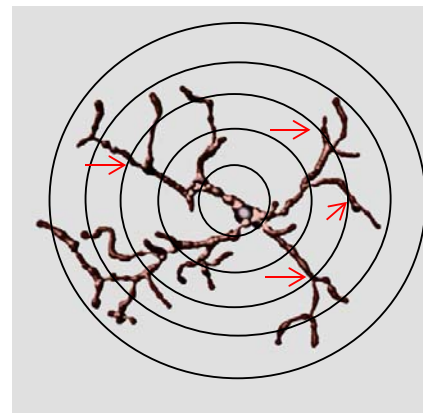

Supplement: Additional file 5: Figure S4. — Schematic representation of the parameter analyzed in 3D-reconstructed microglia. Automated analysis of each structural characteristic was performed using Imaris Bitplane software. (PDF 50 kb) [file 40478_2016_364_MOESM5_ESM.pdf]
